# Supplementary material for: High performance n-type single crystalline transistors of naphthalene bis(dicarboximide) and their anisotropic transport in crystals
Source: Royal Society of Chemistry journal article supplement (doi:10.1039/c2cc31619f), 2012-01-01
Supplement: c2cc31619f.pdf [file c2cc31619f.pdf]

Supporting information for

## High performance n-type single crystalline transistors of naphthalene bis(dicarboximide) and their anisotropic transport in crystals

Aifeng Lv, Yan Li, Wan Yue, Lang Jiang, Huanli Dong, Guangyao Zhao, Qing Meng, Wei Jiang, Yudong He, Zhibo Li, Zhaohui Wang\* and Wenping Hu\*

Figure S1: AFM image of F-NDI single crystal surface

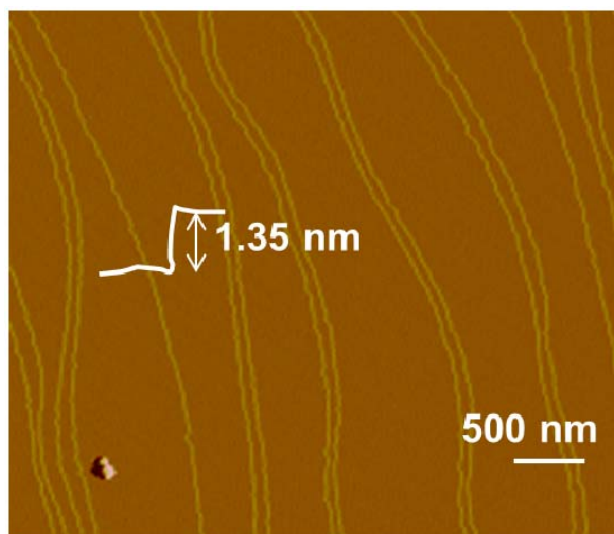

Figure S2: Powder XRD pattern of F-NDI micro crystals.

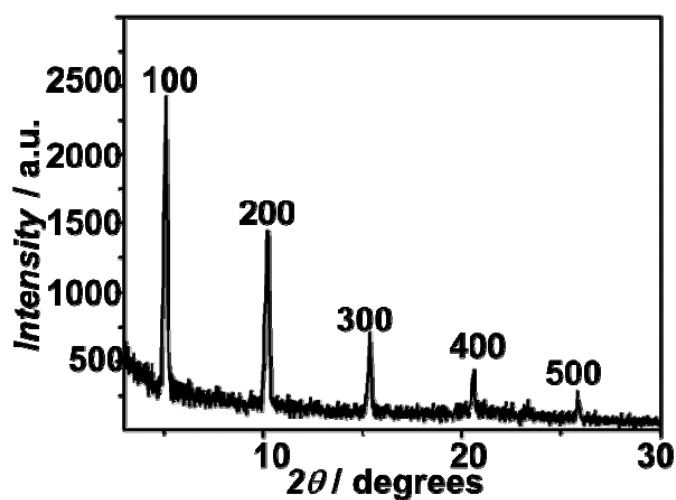

---

‡ Crystal Data of F-NDI. The measurements were made on a Rigaku Saturn CCD area detector with graphite monochromated Mo-K $\alpha$  radiation ( $\lambda$  0.71073 Å) at 173 K. All calculations were performed using the CrystalStructure crystallographic software package and SHELXL-97. C<sub>22</sub>H<sub>8</sub>F<sub>14</sub>N<sub>2</sub>O<sub>4</sub>, M = 630.30, T = 173 (2) K, colorless plate, crystal dimension 0.27 × 0.23 × 0.05 mm, V = 2206(8) Å<sup>3</sup>, s.u. values 0.000-0.001, crystal system monoclinic, space group P2/c, a = 17.379(4) Å, b = 7.7605(16) Å, c = 16.708(3) Å,  $\alpha$  = 90.00°,  $\beta$  = 101.77(3)°,  $\gamma$  = 90.00°, Z = 4, D<sub>c</sub> = 1.898 g/cm<sup>3</sup>,  $\mu$  = 0.208 mm<sup>-1</sup>,  $\theta$  range 2.39-27.51°. Of the 5038 reflections that were collected, 3814 were unique ( R<sub>int</sub> = 0.0633 ), GOF = 1.169. Final R values R<sub>1</sub> = 0.0833, wR<sub>2</sub> = 0.1476.
